# Supplementary material for: Obesity and Abdominal Obesity in Indian Population: Findings from a Nationally Representative Study of 698,286 Participants
Source: MDPI journal article supplement (doi:10.3390/epidemiologia4020017), 2023-05-12
Supplement: s1 [file s1]

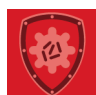

**Table S1.** Prevalence of obesity and abdominal obesity by background characteristics among males.

| Variable                              | Obesity | Abdominal obesity |
|---------------------------------------|---------|-------------------|
| <b>Age group</b>                      |         |                   |
| 18-24                                 | 4.77    | 36.46             |
| 25-34                                 | 10.64   | 51.87             |
| 35-44                                 | 13.28   | 57.98             |
| 45-54                                 | 13.66   | 61.59             |
| <b>Highest Educational Attainment</b> |         |                   |
| No formal schooling                   | 5.82    | 49.62             |
| Up to primary                         | 8.20    | 53.36             |
| Up to secondary                       | 12.32   | 56.07             |
| College and higher                    | 17.64   | 57.88             |
| <b>Marital Status</b>                 |         |                   |
| Never married                         | 9.10    | 54.12             |
| Currently married                     | 11.65   | 55.80             |
| Others <sup>a</sup>                   | 7.42    | 49.67             |
| <b>Household Wealth Status</b>        |         |                   |
| Poorest                               | 3.85    | 47.09             |
| Poorer                                | 6.45    | 51.72             |
| Middle                                | 9.82    | 54.18             |
| Richer                                | 14.71   | 58.00             |
| Richest                               | 21.31   | 61.32             |
| <b>Zone of Residence</b>              |         |                   |
| North                                 | 12.52   | 57.94             |
| North-East                            | 7.61    | 46.39             |
| Central                               | 8.93    | 54.67             |
| East                                  | 7.30    | 58.40             |
| West                                  | 12.06   | 46.71             |
| South                                 | 18.26   | 56.54             |
| <b>Place of Residence</b>             |         |                   |
| Urban                                 | 16.76   | 58.39             |
| Rural                                 | 9.04    | 53.04             |
| <b>Current Smoker/Tobacco use</b>     |         |                   |
| No                                    | 14.91   | 56.72             |
| Yes                                   | 7.93    | 52.85             |
| <b>Current Alcohol Consumption</b>    |         |                   |
| No                                    | 12.11   | 54.97             |
| Yes                                   | 10.04   | 54.78             |

<sup>a</sup> Divorced/Widowed/Separated/Don't Know.

**Table S2.** Prevalence of obesity and abdominal obesity by background characteristics among females.

| Variable         | Obesity | Abdominal obesity |
|------------------|---------|-------------------|
| <b>Age group</b> |         |                   |
| 18-24            | 4.75    | 50.32             |
| 25-34            | 12.65   | 57.04             |
| 35-44            | 19.42   | 61.77             |
| 45-54            | 20.68   | 66.14             |

|                                       |       |       |
|---------------------------------------|-------|-------|
| <b>Highest Educational Attainment</b> |       |       |
| No formal schooling                   | 10.30 | 59.43 |
| Up to primary                         | 15.54 | 60.12 |
| Up to secondary                       | 20.74 | 61.98 |
| College and higher                    | 23.99 | 64.94 |
| <b>Marital Status</b>                 |       |       |
| Never married                         | 12.00 | 61.22 |
| Currently married                     | 16.73 | 61.34 |
| Others <sup>a</sup>                   | 15.06 | 58.94 |
| <b>Household Wealth Status</b>        |       |       |
| Poorest                               | 5.38  | 59.46 |
| Poorer                                | 9.64  | 58.88 |
| Middle                                | 15.17 | 59.44 |
| Richer                                | 21.06 | 61.34 |
| Richest                               | 27.98 | 64.76 |
| <b>Zone of Residence</b>              |       |       |
| North                                 | 18.70 | 69.89 |
| North-East                            | 8.87  | 69.33 |
| Central                               | 14.15 | 58.41 |
| East                                  | 11.39 | 70.74 |
| West                                  | 15.00 | 47.27 |
| South                                 | 24.08 | 55.52 |
| <b>Place of Residence</b>             |       |       |
| Urban                                 | 24.01 | 64.13 |
| Rural                                 | 12.57 | 59.25 |
| <b>Current Smoker/Tobacco use</b>     |       |       |
| No                                    | 17.13 | 61.18 |
| Yes                                   | 8.66  | 57.77 |
| <b>Current Alcohol Consumption</b>    |       |       |
| No                                    | 16.43 | 60.83 |
| Yes                                   | 7.87  | 61.88 |

<sup>a</sup> Divorced/Widowed/Separated/Don't Know.

**Table S3.** Crude and adjusted odds ratio (95% CI) estimates of the factors associated with obesity and abdominal obesity among males.

| Variable                              | Obesity             |                     | Abdominal Obesity   |                     |
|---------------------------------------|---------------------|---------------------|---------------------|---------------------|
|                                       | COR (95% CI)        | AOR (95% CI)        | COR (95% CI)        | AOR (95% CI)        |
| <b>Age group (In years)</b>           |                     |                     |                     |                     |
| 18-24                                 | Ref                 | Ref                 | Ref                 | Ref                 |
| 25-34                                 | 2.38*** (2.20-2.59) | 2.00*** (1.82-2.20) | 1.95*** (1.86-2.03) | 1.70*** (1.61-1.79) |
| 35-44                                 | 3.26*** (3.00-3.53) | 2.67*** (2.40-2.96) | 2.77*** (2.65-2.90) | 2.34*** (2.21-2.49) |
| 45-54                                 | 3.41*** (3.14-3.71) | 2.85*** (2.56-3.18) | 3.18*** (3.03-3.33) | 2.72*** (2.55-2.89) |
| <b>Highest Educational Attainment</b> |                     |                     |                     |                     |
| No formal schooling                   | Ref                 | Ref                 | Ref                 | Ref                 |
| Up to primary                         | 1.30*** (1.16-1.46) | 1.23*** (1.10-1.38) | 1.07* (1.00-1.14)   | 1.14*** (1.07-1.21) |

|                                    |                     |                     |                     |                     |
|------------------------------------|---------------------|---------------------|---------------------|---------------------|
| Up to secondary                    | 1.74*** (1.59-1.91) | 1.52*** (1.38-1.67) | 1.00 (0.95-1.06)    | 1.21*** (1.15-1.28) |
| College and higher                 | 2.17*** (1.96-2.40) | 1.61*** (1.44-1.79) | 0.97 (0.92-1.03)    | 1.21*** (1.13-1.29) |
| <b>Marital Status</b>              |                     |                     |                     |                     |
| Never married                      | Ref                 | Ref                 | Ref                 | Ref                 |
| Currently married                  | 2.25*** (2.12-2.40) | 1.47*** (1.35-1.59) | 2.22*** (2.15-2.30) | 1.36*** (1.29-1.43) |
| Others <sup>a</sup>                | 1.57*** (1.29-1.91) | 1.21 (0.99-1.49)    | 1.59*** (1.41-1.79) | 1.00 (0.88-1.14)    |
| <b>Household Wealth Status</b>     |                     |                     |                     |                     |
| Poorest                            | Ref                 | Ref                 | Ref                 | Ref                 |
| Poorer                             | 1.86*** (1.68-2.07) | 1.65*** (1.49-1.84) | 1.25*** (1.19-1.31) | 1.27*** (1.21-1.34) |
| Middle                             | 2.90*** (2.62-3.20) | 2.32*** (2.08-2.58) | 1.44*** (1.37-1.52) | 1.45*** (1.37-1.54) |
| Richer                             | 4.36*** (3.94-4.82) | 3.25*** (2.91-3.62) | 1.75*** (1.65-1.85) | 1.72*** (1.61-1.83) |
| Richest                            | 6.98*** (6.31-7.72) | 4.98*** (4.43-5.60) | 2.12*** (1.99-2.25) | 1.97*** (1.83-2.13) |
| <b>Zone of Residence</b>           |                     |                     |                     |                     |
| North                              | Ref                 | Ref                 | Ref                 | Ref                 |
| North-East                         | 0.70*** (0.63-0.78) | 1.22*** (1.09-1.35) | 0.47*** (0.43-0.51) | 0.54*** (0.50-0.60) |
| Central                            | 0.58*** (0.53-0.64) | 0.88** (0.80-0.96)  | 0.71*** (0.66-0.77) | 0.85*** (0.78-0.92) |
| East                               | 0.52*** (0.47-0.58) | 0.95 (0.85-1.06)    | 0.84*** (0.77-0.92) | 1.07 (0.97-1.17)    |
| West                               | 0.78*** (0.70-0.88) | 0.89* (0.80-0.99)   | 0.47*** (0.42-0.52) | 0.47*** (0.42-0.52) |
| South                              | 1.55*** (1.41-1.70) | 1.61*** (1.47-1.76) | 0.75*** (0.68-0.81) | 0.70*** (0.64-0.77) |
| <b>Place of Residence</b>          |                     |                     |                     |                     |
| Urban                              | Ref                 | Ref                 | Ref                 | Ref                 |
| Rural                              | 0.48*** (0.45-0.51) | 0.86*** (0.81-0.92) | 0.75*** (0.71-0.79) | 0.92*** (0.86-0.98) |
| <b>Current Smoker/Tobacco use</b>  |                     |                     |                     |                     |
| No                                 | Ref                 | Ref                 | Ref                 | Ref                 |
| Yes                                | 0.75*** (0.71-0.79) | 0.80*** (0.75-0.84) | 1.12*** (1.09-1.16) | 0.93*** (0.89-0.96) |
| <b>Current Alcohol Consumption</b> |                     |                     |                     |                     |
| No                                 | Ref                 | Ref                 | Ref                 | Ref                 |
| Yes                                | 1.00 (0.94-1.06)    | 1.03 (0.97-1.10)    | 1.16*** (1.12-1.20) | 1.01 (0.97-1.06)    |

\*,  $p < 0.05$ ; \*\*,  $p < 0.01$ ; \*\*\*,  $p < 0.001$ ; AOR: Adjusted Odds Ratio; CI: Confidence Interval; COR: Crude Odds Ratio. <sup>a</sup> Divorced/Widowed/Separated/Don't Know.

**Table S4.** Crude and adjusted odds ratio (95% CI) estimates of the factors associated with obesity and abdominal obesity among females.

| Variable | Obesity      |              | Abdominal Obesity |              |
|----------|--------------|--------------|-------------------|--------------|
|          | COR (95% CI) | AOR (95% CI) | COR (95% CI)      | AOR (95% CI) |

| <b>Age group (In years)</b>           |                     |                     |                     |                     |
|---------------------------------------|---------------------|---------------------|---------------------|---------------------|
| 18-24                                 | Ref                 | Ref                 | Ref                 | Ref                 |
| 25-34                                 | 3.06*** (2.97-3.16) | 2.31*** (2.23-2.39) | 1.46*** (1.44-1.48) | 1.30*** (1.28-1.32) |
| 35-44                                 | 5.29*** (5.14-5.45) | 3.99*** (3.85-4.13) | 1.88*** (1.85-1.91) | 1.67*** (1.63-1.70) |
| 45-54                                 | 5.89*** (5.70-6.08) | 4.50*** (4.33-4.68) | 2.30*** (2.26-2.35) | 2.06*** (2.01-2.11) |
| <b>Highest Educational Attainment</b> |                     |                     |                     |                     |
| No formal schooling                   | Ref                 | Ref                 | Ref                 | Ref                 |
| Up to primary                         | 1.18*** (1.15-1.22) | 1.22*** (1.19-1.26) | 0.92*** (0.90-0.94) | 1.00 (0.98-1.02)    |
| Up to secondary                       | 1.11*** (1.09-1.14) | 1.30*** (1.26-1.33) | 0.80*** (0.79-0.82) | 1.02* (1.00-1.04)   |
| College and higher                    | 0.90*** (0.87-0.93) | 1.17*** (1.13-1.21) | 0.71*** (0.69-0.72) | 1.02 (1.00-1.05)    |
| <b>Marital Status</b>                 |                     |                     |                     |                     |
| Never married                         | Ref                 | Ref                 | Ref                 | Ref                 |
| Currently married                     | 4.16*** (4.03-4.30) | 1.95*** (1.88-2.03) | 1.75*** (1.73-1.78) | 1.31*** (1.28-1.34) |
| Others <sup>a</sup>                   | 4.07*** (3.88-4.27) | 1.75*** (1.66-1.85) | 1.87*** (1.81-1.93) | 1.27*** (1.23-1.31) |
| <b>Household Wealth Status</b>        |                     |                     |                     |                     |
| Poorest                               | Ref                 | Ref                 | Ref                 | Ref                 |
| Poorer                                | 1.92*** (1.85-2.00) | 1.78*** (1.71-1.85) | 1.06*** (1.04-1.08) | 1.08*** (1.06-1.10) |
| Middle                                | 3.08*** (2.97-3.19) | 2.62*** (2.52-2.72) | 1.12*** (1.10-1.15) | 1.16*** (1.14-1.19) |
| Richer                                | 4.57*** (4.41-4.73) | 3.66*** (3.52-3.81) | 1.21*** (1.18-1.23) | 1.25*** (1.22-1.28) |
| Richest                               | 6.87*** (6.62-7.13) | 5.21*** (4.99-5.43) | 1.33*** (1.29-1.36) | 1.33*** (1.29-1.37) |
| <b>Zone of Residence</b>              |                     |                     |                     |                     |
| North                                 | Ref                 | Ref                 | Ref                 | Ref                 |
| North-East                            | 0.46*** (0.44-0.48) | 0.81*** (0.78-0.85) | 0.78*** (0.74-0.82) | 0.88*** (0.83-0.92) |
| Central                               | 0.58*** (0.56-0.60) | 0.91*** (0.87-0.94) | 0.42*** (0.40-0.44) | 0.46*** (0.44-0.48) |
| East                                  | 0.47*** (0.45-0.49) | 0.90*** (0.86-0.94) | 0.71*** (0.67-0.74) | 0.80*** (0.76-0.84) |
| West                                  | 0.72*** (0.69-0.76) | 0.77*** (0.73-0.80) | 0.25*** (0.24-0.26) | 0.24*** (0.23-0.26) |
| South                                 | 1.43*** (1.37-1.49) | 1.45*** (1.39-1.50) | 0.39*** (0.37-0.41) | 0.37*** (0.35-0.39) |
| <b>Place of Residence</b>             |                     |                     |                     |                     |
| Urban                                 | Ref                 | Ref                 | Ref                 | Ref                 |
| Rural                                 | 0.39*** (0.38-0.40) | 0.72*** (0.70-0.74) | 0.82*** (0.80-0.85) | 0.85*** (0.82-0.88) |
| <b>Current Smoker/Tobacco use</b>     |                     |                     |                     |                     |
| No                                    | Ref                 | Ref                 | Ref                 | Ref                 |

|                                    |                     |                     |                     |                     |
|------------------------------------|---------------------|---------------------|---------------------|---------------------|
| Yes                                | 0.80*** (0.78-0.83) | 0.83*** (0.80-0.86) | 1.08*** (1.05-1.10) | 0.90*** (0.88-0.92) |
| <b>Current Alcohol Consumption</b> |                     |                     |                     |                     |
| No                                 | Ref                 | Ref                 | Ref                 | Ref                 |
| Yes                                | 0.84*** (0.78-0.89) | 0.98 (0.92-1.05)    | 1.22*** (1.17-1.27) | 1.09*** (1.04-1.14) |

\*,  $p < 0.05$ ; \*\*,  $p < 0.01$ ; \*\*\*,  $p < 0.001$ ; AOR: Adjusted Odds Ratio; CI: Confidence Interval; COR: Crude Odds Ratio; <sup>a</sup> Divorced/Widowed/Separated/Don't Know.
